# Supplementary material
Source: ML conference proceedings conference paper supplement (https://openaccess.thecvf.com/content/CVPR2022/html/Tan_Multi-Grained_Spatio-Temporal_Features_CVPR_2022_paper.html)
Supplement: Supplementary file 1 [file Tan_Multi-Grained_Spatio-Temporal_Features_CVPR_2022_supplemental.zip]

# Multi-grained Spatio-Temporal Features Perceived Network for Event-based Lip-Reading

## Supplementary Material

In this part, we first describe more details about the vocabulary selection process of the DVS-Lip dataset. Then, we present more qualitative visualization results on the test set of the DVS-Lip dataset.

### A. Vocabulary Selection

To explore the advantages of event cameras in capturing fine-grained movement evolution information, we divide the vocabulary of the DVS-Lip dataset into two parts, where the first part is composed of visually similar word pairs and the second part is composed of common words. The first part of the vocabulary consists of the 25 most frequently confused word pairs that are selected from the vocabulary (500 words in total) of the LRW dataset [1]. To evaluate the confusions between words, we first run the model in [2] on the test set of the LRW dataset. Then, the confusion of each word is set to the proportion of the most common incorrect prediction results corresponding to the word. This is consistent with the word pair confusion evaluation in [1]. The most frequently confused word pairs are shown in Table 1. For the second part of our vocabulary, we randomly select another 50 words from the vocabulary of the LRW dataset. Combining the two parts, the vocabulary of the DVS-Lip dataset contains a total of 100 words. The full list of the vocabulary is shown in Table 2.

| Label      | Prediction | Proportion | Label     | Prediction | Proportion |
|------------|------------|------------|-----------|------------|------------|
| price      | press      | 0.20       | happened  | happen     | 0.12       |
| difference | different  | 0.18       | Syrian    | Syria      | 0.12       |
| benefits   | benefit    | 0.16       | taking    | taken      | 0.12       |
| little     | legal      | 0.16       | challenge | change     | 0.12       |
| million    | billion    | 0.16       | terms     | times      | 0.10       |
| worst      | words      | 0.16       | around    | ground     | 0.10       |
| spend      | spent      | 0.16       | missing   | meeting    | 0.10       |
| think      | thing      | 0.16       | called    | court      | 0.10       |
| number     | numbers    | 0.14       | election  | action     | 0.10       |
| allow      | allowed    | 0.14       | giving    | evening    | 0.10       |
| American   | America    | 0.14       | paying    | being      | 0.10       |
| heavy      | having     | 0.14       | these     | needs      | 0.10       |
| Russian    | Russia     | 0.14       |           |            |            |

Table 1. Labels and their corresponding most frequently mispredictions, results come from the model in [2] on LRW dataset [1].

### B. Qualitative Results

In this section, we present more qualitative results by applying the Grad-CAM [3] to our MSTP using the samples from the DVS-Lip test set. Figure 1 and Figure 2 show the examples from the first part of the test set, and Figure 3

|       |             |            |            |           |             |
|-------|-------------|------------|------------|-----------|-------------|
| Part1 | allow       | allowed    | America    | American  | benefit     |
|       | benefits    | challenge  | change     | court     | called      |
|       | different   | difference | happen     | happened  | heavy       |
|       | having      | little     | legal      | million   | billion     |
|       | number      | numbers    | price      | press     | Syria       |
|       | Syrian      | taking     | taken      | think     | thing       |
|       | worst       | words      | around     | ground    | terms       |
|       | times       | paying     | being      | missing   | meeting     |
|       | election    | action     | giving     | evening   | Russia      |
|       | Russian     | spend      | spent      | these     | needs       |
| Part2 | tomorrow    | right      | still      | years     | significant |
|       | become      | house      | everything | should    | warning     |
|       | economic    | several    | young      | majority  | attacks     |
|       | exactly     | accused    | death      | hundreds  | support     |
|       | described   | labour     | chief      | welcome   | leaders     |
|       | water       | during     | under      | England   | judge       |
|       | general     | saying     | between    | capital   | started     |
|       | security    | perhaps    | minutes    | potential | another     |
|       | couple      | banks      | Germany    | point     | London      |
|       | immigration | question   | really     | military  | education   |

Table 2. Vocabulary of the DVS-Lip dataset.

shows the examples from the second part of the test set. The first row of each example shows the saliency maps for the low-rate branch’s input event frames ( $T^{low} = 30$ ), and the second row shows the saliency maps for the input event frames ( $T^{high} = 210$ ) of the high-rate branch. The saliency maps for the high-rate branch are downsampled by a factor of 7 so that the saliency maps from the two branches are aligned in time. We only display the event frames that contain the corresponding word. These results demonstrate that our MSTP can automatically select important spatio-temporal regions for word recognition from event frame inputs of different granularities. Accordingly, the model can learn both complete spatial features and fine temporal features.

### References

- [1] Joon Son Chung and Andrew Zisserman. Lip reading in the wild. In *Asian conference on computer vision*, pages 87–103. Springer, 2016. 1
- [2] Dalu Feng, Shuang Yang, Shiguang Shan, and Xilin Chen. Learn an effective lip reading model without pains. *arXiv preprint arXiv:2011.07557*, 2020. 1
- [3] Ramprasaath R Selvaraju, Michael Cogswell, Abhishek Das, Ramakrishna Vedantam, Devi Parikh, and Dhruv Batra. Grad-cam: Visual explanations from deep networks via gradient-based localization. In *Proceedings of the IEEE international conference on computer vision*, pages 618–626, 2017. 1

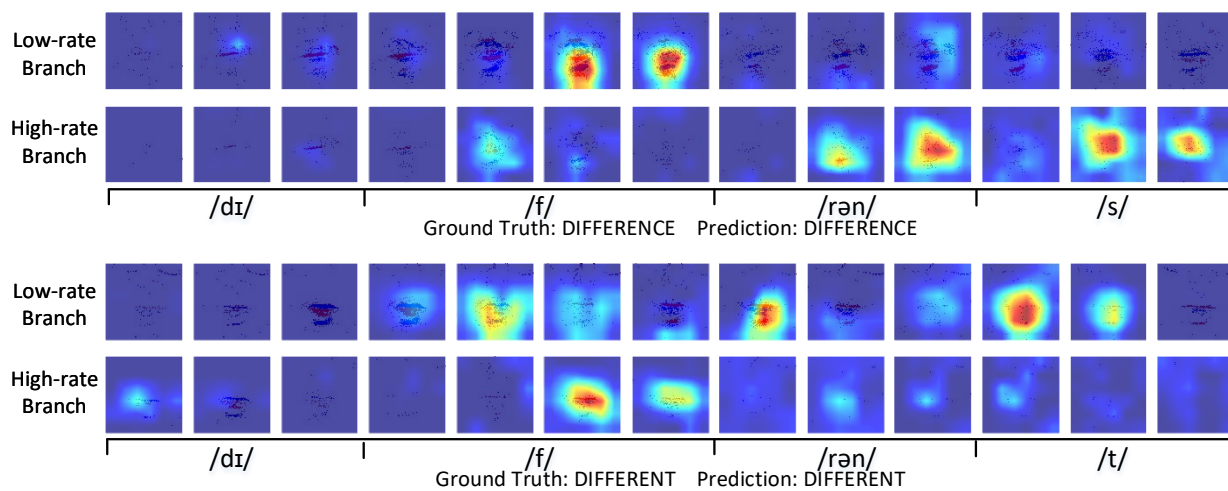

Figure 1. Visualization of the saliency maps for words “difference” and “different”.

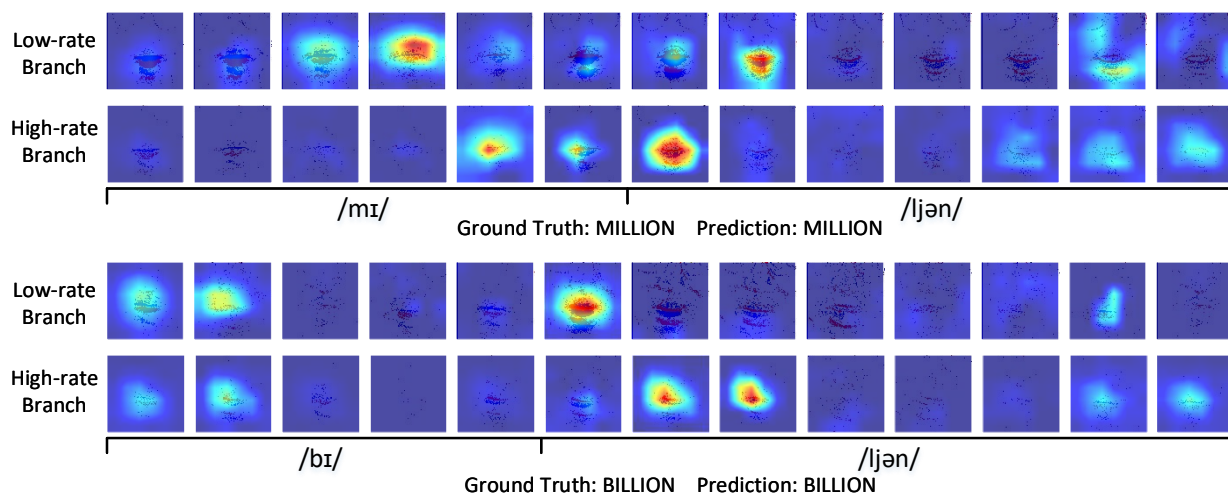

Figure 2. Visualization of the saliency maps for words “million” and “billion”.

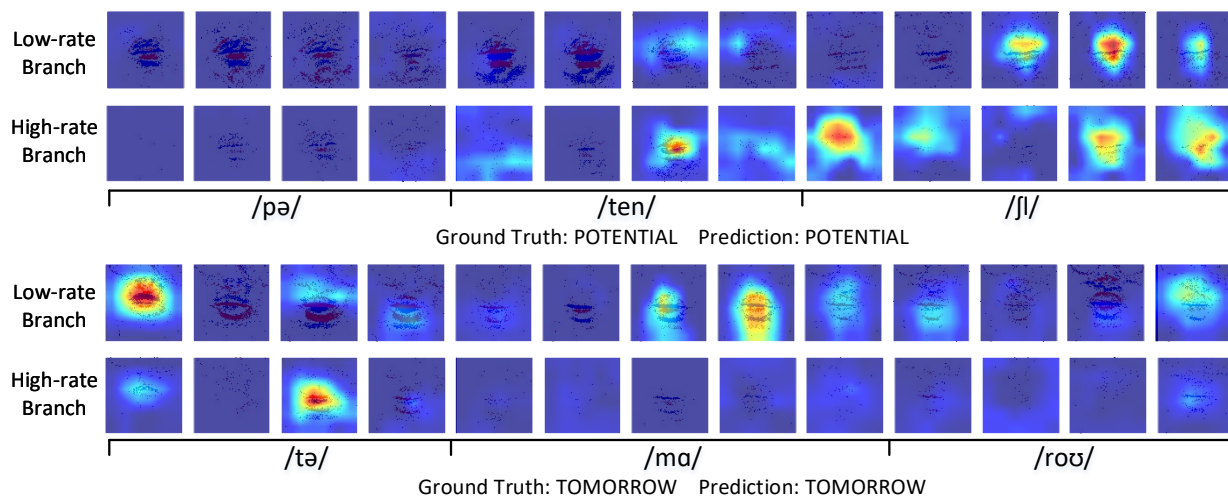

Figure 3. Visualization of the saliency maps for words “potential” and “tomorrow”.
